# Supplementary material for: Fresh and cultured mouse islets differ in their response to nutrient stimulation
Source: PubMed Central journal article supplement — Endocr Connect. 2020 Jul 19;9(8):769–82. doi: 10.1530/EC-20-0289 (PMC7424343; doi:10.1530/ec-20-0289), 2020-07-19
Supplement: supplementary_figure_1.pdf [file supplementary_figure_1.pdf]

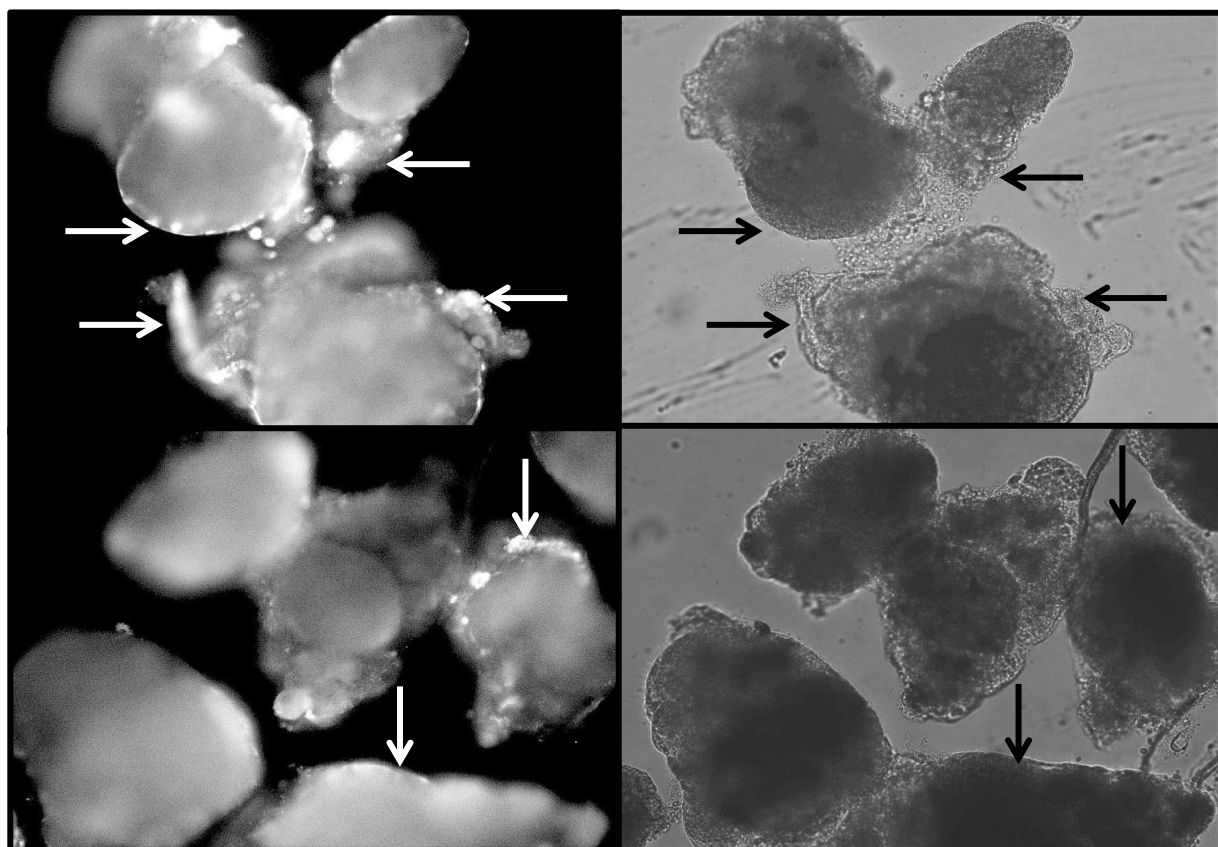

A

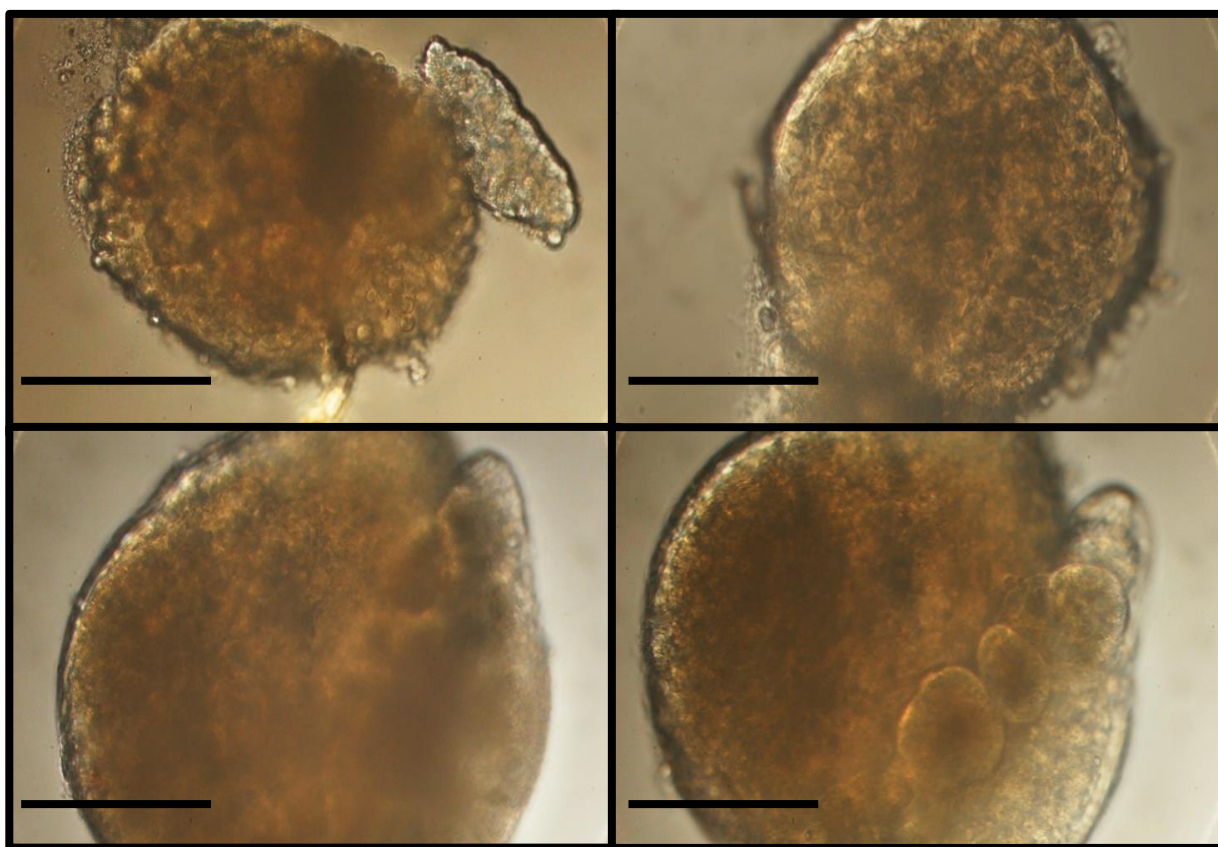

B

Fig. S1

## Supplemental Figure S1

(A) Microdissected NMRI islets loaded with Fura 2. Fluorescence excitation at 340 nm (left) and transmitted light (right) of freshly isolated islets (upper row) and 22h cultured islets (lower row). The bright fluorescent spots (white arrows) correspond mainly to residual exocrine tissue (black arrows).

(B) Microdissected NMRI islets as visualized by transmitted light in DIC contrast. The left images depict the freshly isolated state, the right images depict the same islet after 22h culture in RPMI 1640 with 5 mM glucose and 10% FCS.
