# Supplementary material for: Fresh and cultured mouse islets differ in their response to nutrient stimulation
Source: PubMed Central journal article supplement — Endocr Connect. 2020 Jul 19;9(8):769–82. doi: 10.1530/EC-20-0289 (PMC7424343; doi:10.1530/ec-20-0289), 2020-07-19
Supplement: supplementary_figure_2.pdf [file supplementary_figure_2.pdf]

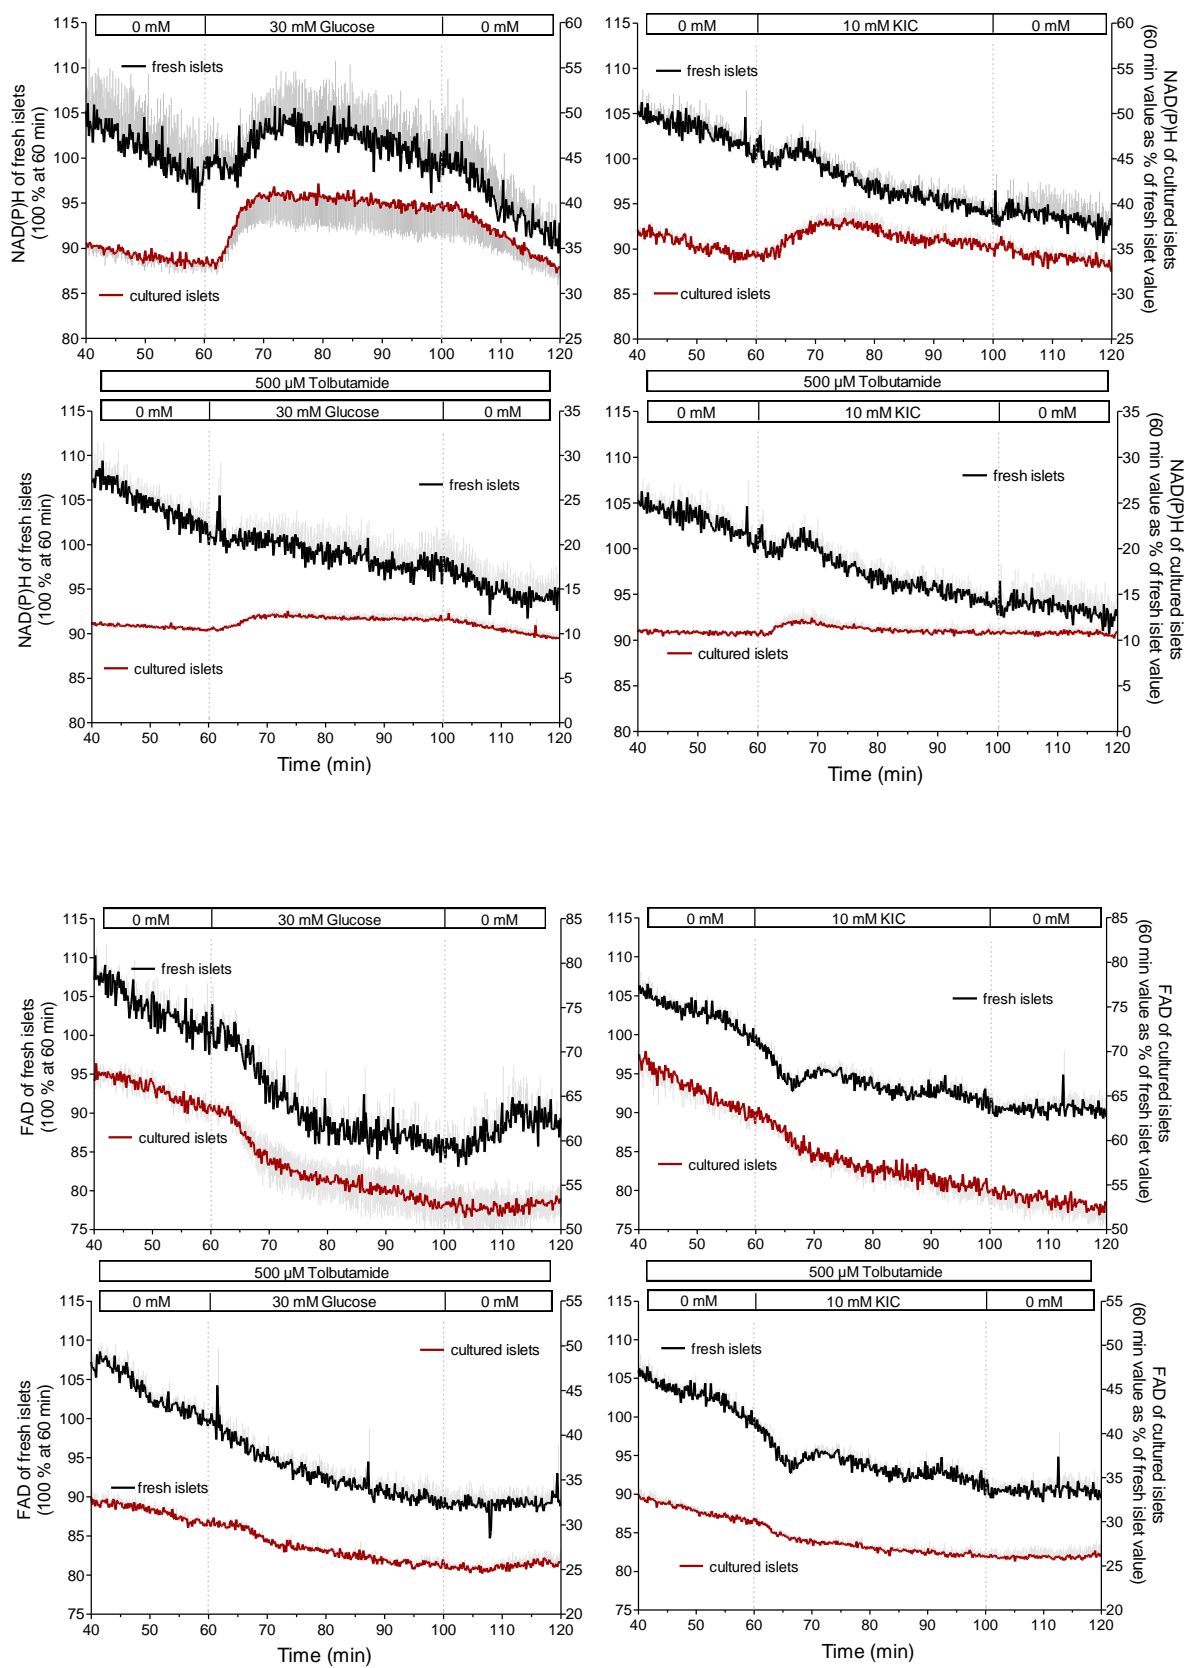

Fig. S2

## Supplemental Figure S2

The upper four graphs depict the NAD(P)H fluorescence traces, the lower four graphs depict the simultaneously measured FAD fluorescence traces when NMRI mouse islets were perfused with 0 mM glucose from 0 min to 60 min, with 30 mM glucose from 60 min to 100 min and with 0 mM glucose thereafter (upper rows) or when this protocol was executed in the presence of 500  $\mu$ M tolbutamide (lower rows).

The black traces depict the fluorescence of the fresh islets, the red traces depict the fluorescence of the 22h-cultured islets. To generate mean values the fluorescence intensity of each single experiment is normalized to 100 % at 60 min for the fresh islets. The corresponding value of the cultured islets is given as percent of the value of the fresh islets.
