# Supplementary material for: Fresh and cultured mouse islets differ in their response to nutrient stimulation
Source: PubMed Central journal article supplement — Endocr Connect. 2020 Jul 19;9(8):769–82. doi: 10.1530/EC-20-0289 (PMC7424343; doi:10.1530/ec-20-0289), 2020-07-19
Supplement: supplementary_figure_3.pdf [file supplementary_figure_3.pdf]

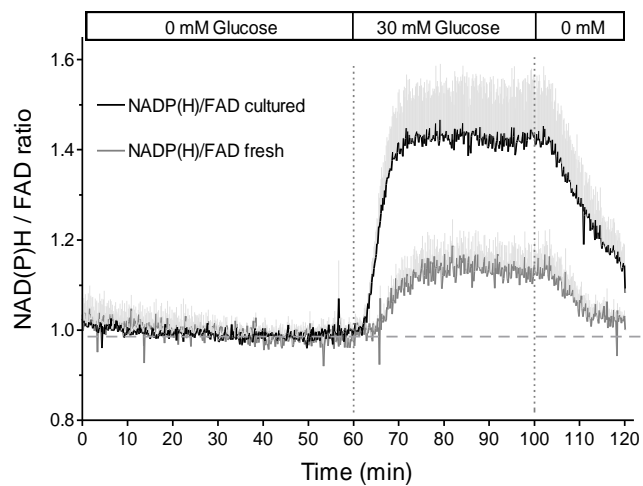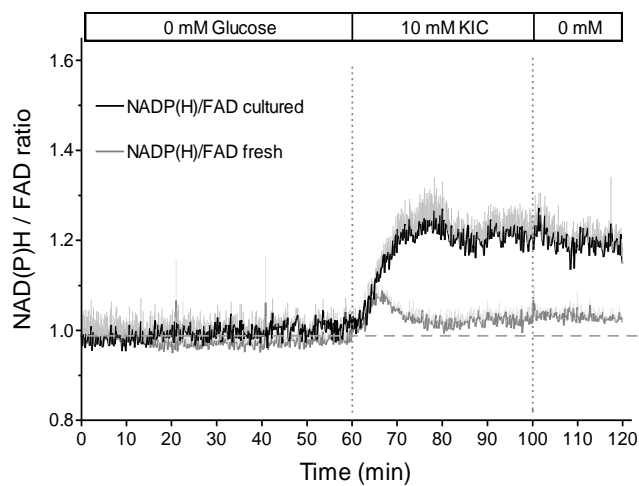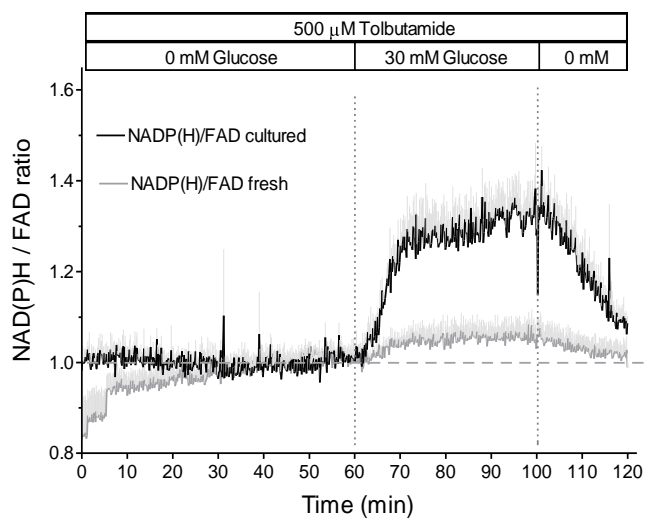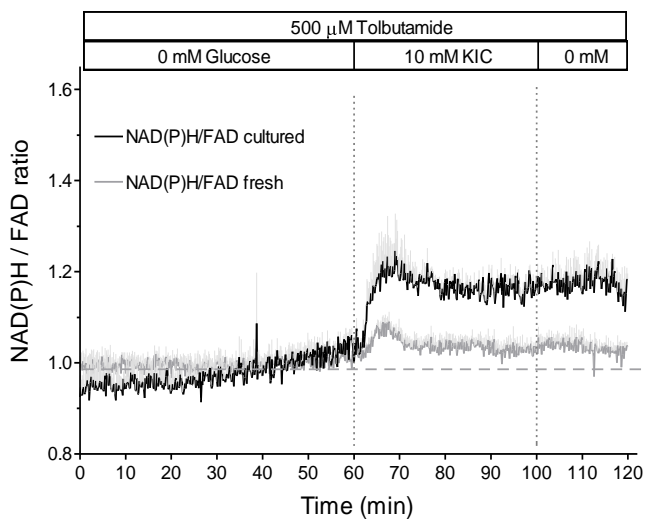

Fig. S3

### Supplemental Figure S3

The graphs depict the ratio of the NAD(P)H /FAD fluorescence traces , when NMRI mouse islets were perfused with 0 mM glucose from 0 min to 60 min, with 30 mM glucose (left) or 10 mM KIC (right) from 60 min to 100 min and with 0 mM glucose thereafter (upper row) or when this protocol was executed in the presence of 500  $\mu$ M tolbutamide (lower row).

The black traces depict the NAD(P)H /FAD ratio of the 22h-cultured islets , the grey traces depict the NAD(P)H /FAD ratio of the fresh islets. When both traces are normalized to 100 % at 60 min, the larger relative increase of this ratio in cultured islets becomes visible with both nutrients. Nevertheless , the characteristic difference between glucose and KIC is visible in fresh as well as in cultured islets.
